# Supplementary material for: Personalized computational heart models with T1-mapped fibrotic remodeling predict sudden death risk in patients with hypertrophic cardiomyopathy
Source: PubMed Central journal article supplement (PMC8789259; doi:10.7554/elife.73325), 2022-01-25
Supplement: elife-73325-transrepform1.pdf [file elife-73325-transrepform1.pdf]

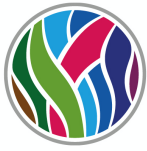

## eLife's transparent reporting form

We encourage authors to provide detailed information *within their submission* to facilitate the interpretation and replication of experiments. Authors can upload supporting documentation to indicate the use of appropriate reporting guidelines for health-related research (see [EQUATOR Network](#)), life science research (see the [BioSharing Information Resource](#)), or the [ARRIVE guidelines](#) for reporting work involving animal research. Where applicable, authors should refer to any relevant reporting standards documents in this form.

If you have any questions, please consult our Journal Policies and/or contact us: [editorial@elifesciences.org](mailto:editorial@elifesciences.org).

### Sample-size estimation

- You should state whether an appropriate sample size was computed when the study was being designed
- You should state the statistical method of sample size computation and any required assumptions
- If no explicit power analysis was used, you should describe how you decided what sample (replicate) size (number) to use

Please outline where this information can be found within the submission (e.g., sections or figure legends), or explain why this information doesn't apply to your submission:

No explicit power analysis was used in this study. Late gadolinium enhanced (LGE) and post-contrast T1 MRI acquisition is difficult and only 13 patients with hypertrophic cardiomyopathy (HCM) had scans of sufficient quality with clinically verified ventricular arrhythmia (VA). An additional 13 patients with HCM and sufficient quality scans that did not have VA we included to match this number.

### Replicates

- You should report how often each experiment was performed
- You should include a definition of biological versus technical replication
- The data obtained should be provided and sufficient information should be provided to indicate the number of independent biological and/or technical replicates
- If you encountered any outliers, you should describe how these were handled
- Criteria for exclusion/inclusion of data should be clearly stated
- High-throughput sequence data should be uploaded before submission, with a private link for reviewers provided (these are available from both GEO and ArrayExpress)

Please outline where this information can be found within the submission (e.g., sections or figure legends), or explain why this information doesn't apply to your submission:

Replicates in this retrospective study were not necessary given the deterministic nature of the computational simulations. Patient inclusion criteria included clinically diagnosed HCM, an implanted cardioverter defibrillator, a complete short-axis LGE MRI scan, and a post-contrast T1 map. Exclusion criteria included any one of the following: Missing MRI data (LGE or T1), MRI artifacts (aliasing, motion artifacts, foreign bodies), non-HCM diagnosis, presence of other ventricular disease.



### Statistical reporting

- Statistical analysis methods should be described and justified
- Raw data should be presented in figures whenever informative to do so (typically when N per group is less than 10)
- For each experiment, you should identify the statistical tests used, exact values of N, definitions of center, methods of multiple test correction, and dispersion and precision measures (e.g., mean, median, SD, SEM, confidence intervals; and, for the major substantive results, a measure of effect size (e.g., Pearson's r, Cohen's d)
- Report exact p-values wherever possible alongside the summary statistics and 95% confidence intervals. These should be reported for all key questions and not only when the p-value is less than 0.05.

Please outline where this information can be found within the submission (e.g., sections or figure legends), or explain why this information doesn't apply to your submission:

Statistical significance was determined with two-tailed *t*-test ( $P \leq 0.05$ ). Confidence intervals were calculated with 95% certainty. Unique VAs were correlated to fibrosis amount using linear regression. All statistical analysis was performed using MATLAB or Excel.

(For large datasets, or papers with a very large number of statistical tests, you may upload a single table file with tests, Ns, etc., with reference to sections in the manuscript.)

### Group allocation

- Indicate how samples were allocated into experimental groups (in the case of clinical studies, please specify allocation to treatment method); if randomization was used, please also state if restricted randomization was applied
- Indicate if masking was used during group allocation, data collection and/or data analysis

Please outline where this information can be found within the submission (e.g., sections or figure legends), or explain why this information doesn't apply to your submission:

Samples were allocated into two experimental groups: patients with clinically identified VA and patients without clinically identified VA determined by ICD firing. More information can be found in the methods section under the study population heading and Table 1.

### Additional data files ("source data")

- We encourage you to upload relevant additional data files, such as numerical data that are represented as a graph in a figure, or as a summary table
- Where provided, these should be in the most useful format, and they can be uploaded as "Source data" files linked to a main figure or table
- Include model definition files including the full list of parameters used
- Include code used for data analysis (e.g., R, MatLab)
- Avoid stating that data files are "available upon request"

Please indicate the figures or tables for which source data files have been provided:

Raw numerical data (Figures 2, 4, and 5) has been provided as supplemental material for peer review and will be made available via figshare prior to publication once the manuscript is accepted. The segmented MRI images of the left ventricles used to generate the finite element meshes for the computational models used in this study are available on Dryad ([here](#)).
