# Supplementary material for: Personalized computational heart models with T1-mapped fibrotic remodeling predict sudden death risk in patients with hypertrophic cardiomyopathy
Source: eLife. 2022 Jan 25;11:e73325. doi: 10.7554/eLife.73325 (PMC8789259; doi:10.7554/eLife.73325)
Supplement: Figure 2—source data 1. [file elife-73325-fig2-data1.xlsx]

## Sheet: Sheet1
Patient	Tag	Diffuse_LGE (%)	Diffuse_T1 (%)
1	Clinical VA	10.83	51.02
2	Clinical VA	7.5	31.22
3	Clinical VA	9.46	40.34
4	Clinical VA	10.76	46.84
5	Clinical VA	9.86	45.3
6	Clinical VA	9.62	36.2
7	Clinical VA	10.3	67.33
8	Clinical VA	7.93	31.48
9	Clinical VA	8.54	42.93
10	Clinical VA	7.75	47.36
11	Clinical VA	7.09	27.82
12	Clinical VA	9.23	36.29
13	Clinical VA	7.06	33.84
14	No VA	6.07	45.62
15	No VA	8.08	48.19
16	No VA	8.55	38.55
17	No VA	6.98	24.04
18	No VA	12.94	43.84
19	No VA	8.16	44.06
20	No VA	11.6	51.75
21	No VA	9.76	40.51
22	No VA	8.78	41.59
23	No VA	8.71	43.36
24	No VA	9.33	33.38
25	No VA	6.11	27.26
26	No VA	10.11	31.22
