# Supplementary material for: Personalized computational heart models with T1-mapped fibrotic remodeling predict sudden death risk in patients with hypertrophic cardiomyopathy
Source: eLife. 2022 Jan 25;11:e73325. doi: 10.7554/eLife.73325 (PMC8789259; doi:10.7554/eLife.73325)
Supplement: Figure 4—source data 1. [file elife-73325-fig4-data1.xlsx]

## Sheet: Sheet1
Patient	BinaryInducibility_LGE	BinaryInducibility_T1	VAMorphologies_LGE	VAMorphologies_T1	Diffuse_T1 (%)
1	No	No	0	0	51.02
2	No	No	0	0	31.22
3	No	Yes	0	1	40.34
4	No	Yes	0	1	46.84
5	Yes	Yes	1	1	45.3
6	Yes	Yes	1	1	36.2
7	Yes	Yes	1	2	67.33
8	Yes	Yes	1	2	31.48
9	Yes	Yes	1	2	42.93
10	Yes	Yes	1	2	47.36
11	Yes	Yes	2	3	27.82
12	Yes	Yes	2	2	36.29
13	Yes	Yes	2	3	33.84
14	No	No	0	0	45.62
15	No	No	0	0	48.19
16	No	No	0	0	38.55
17	No	No	0	0	24.04
18	Yes	Yes	1	1	43.84
19	Yes	Yes	1	1	44.06
20	No	No	0	0	51.75
21	No	No	0	0	40.51
22	No	No	0	0	41.59
23	Yes	Yes	1	2	43.36
24	No	No	0	0	33.38
25	No	No	0	0	27.26
26	No	No	0	0	31.22
