# Supplementary material for: Personalized computational heart models with T1-mapped fibrotic remodeling predict sudden death risk in patients with hypertrophic cardiomyopathy
Source: eLife. 2022 Jan 25;11:e73325. doi: 10.7554/eLife.73325 (PMC8789259; doi:10.7554/eLife.73325)
Supplement: Figure 5—source data 1. [file elife-73325-fig5-data1.xlsx]

## Sheet: Sheet1
Patient	Tag	VAMorphologies_LGE	VAMorphologies_T1
1	Clinical VA	0	0
2	Clinical VA	0	0
3	Clinical VA	0	1
4	Clinical VA	0	1
5	Clinical VA	1	1
6	Clinical VA	1	1
7	Clinical VA	1	2
8	Clinical VA	1	2
9	Clinical VA	1	2
10	Clinical VA	1	2
11	Clinical VA	2	3
12	Clinical VA	2	2
13	Clinical VA	2	3
